# Supplementary material for: In vitro and in vivo anti-herpes simplex virus activity of monogalactosyl diacylglyceride from Coccomyxa sp. KJ (IPOD FERM BP-22254), a green microalga
Source: PLoS One. 2019 Jul 16;14(7):e0219305. doi: 10.1371/journal.pone.0219305 (PMC6634382; doi:10.1371/journal.pone.0219305)
Supplement: S1 File — (XLSX) [file pone.0219305.s005.xlsx]

## Sheet: Dataset of Fig 2
	MGDG	a	b	c	d	e	f	g
	(µg/ml)
	25	102	44	63	70	61	51	51
		99	40	63	70	64	53	48
		100.5 ± 2.1	42.0 ± 2.8	63.0 ± 0	70.0 ± 0	62.5 ± 2.1	52.0 ± 1.4	49.5 ± 2.1
	50	79	32	30	40	46	33	34
		80	35	28	35	55	43	27
		79.5 ± 0.7	33.5 ± 2.1	29.0 ± 1.3	37.5 ± 3.5	50.5 ± 6.4	38.0 ± 7.1	30.5 ± 4.9

## Sheet: Dataset of Fig 3
Conc.	Residual infectivity
(µg/ml)	0 min	5 min	10 min	15 min	30 min	60 min	120 min	180 min	360 min
0	100	97	99	98	91	83	72	63	41
	100	101	95	97	88	78	71	59	40
	100	96	99	93	84	74	68	52	32
0.01	98	98	86	81	73	61	44	31	20
	103	94	92	87	80	60	43	26	17
	96	97	90	85	71	50	38	20	11
0.1	93	93	90	80	66	57	42	19	6.6
	104	90	87	73	70	51	39	22	11
	93	96	86	82	77	43	30	11	6.3
1	97	88	78	75	70	43	28	12	8.5
	100	81	79	72	65	35	22	6.5	2.2
	101	79	72	71	60	41	30	7.2	2.7
10	95	69	69	51	30	16	1.9	0	0
	103	70	59	43	19	4.3	1.1	1.1	0
	99	64	58	40	20	7.2	1.8	0.9	0
50	92	9.4	3.8	2.8	0	0	0	0	0
	102	13	5.4	1.1	0	0	0	0	0
	93	11	0.9	0.9	0	0	0	0	0
Incubation time (min)	Average							SD
	0 µg/ml	0.01 µg/ml	0.1 µg/ml	1 µg/ml	10 µg/ml	50 µg/ml		0 µg/ml	0.01 µg/ml	0.1 µg/ml	1 µg/ml	10 µg/ml	50 µg/ml
0	100	94	88	77	77	50		2.82843	2.82843	4.24264	4.24264	2.82843	5.65685
5	98.5	97	93.5	76	73	8.75		3.53553	4.24264	9.19239	5.65685	2.82843	1.76777
10	101	90.5	91	77	65	0.81		2.82843	0.707107	7.07107	7.07107	1.41421	0.0848528
15	97.5	87.5	83	76	43.5	0.56		2.12132	0.707107	1.41421	9.89949	2.12132	0.268701
30	84.5	72	69.5	59	22	0		4.94975	8.48528	10.6066	5.65685	4.24264	0
45	80	59.5	54	54.5	9.2	0		2.82843	0.707107	2.82843	12.0208	2.54558	0
60	77	51	43	37	8.6	0		2.82843	5.65685	9.89949	4.24264	1.27279	0
120	72	39.5	32	29.5	0.099	0		2.82843	4.94975	4.24264	7.77817	0.0296985	0
180	55	22	10.3	6.95	0.0795	0		1.41421	1.41421	2.40416	1.48492	0.0289914	0
360	38	14	5.5	2.5	0.0475	0		1.41421	4.24264	0	0.282843	0.0388909	0

## Sheet: Dataset of Fig 4.
Group	Virus diameter (nm)
Untreated (n=5)	272, 283, 302, 306, 308
MGDG treated (n=20)	66, 70, 79, 79, 79, 88, 88, 93, 93, 93, 98, 98, 98, 102, 107, 107, 107, 107, 112, 118

## Sheet: Dataset of Fig 5A.
Treatment	Survival days
PBS	7	8	9	9	10
MGDG (10 µg/ml)	8	19	11	14	14
MGDG (50 µg/ml)	14	14	14	14	14
MGDG (250 µg/ml)	14	14	14	14	14

## Sheet: Dataset of Fig 5B.
MGDG	Days after viral infection
(µg/ml)	0	1	2	3	4	5	6	7	8	9	10	11	12	13	14
0	0	0	0	0	0	0	1	2	3	4	5	5	5	5	5
	0	0	0	0	0	1	1	3	4	5	5	5	5	5	5
	0	0	0	0	1	1	2	3	4	5	5	5	5	5	5
	0	0	0	0	1	1	2	4	5	5	5	5	5	5	5
	0	0	0	0	1	2	3	5	5	5	5	5	5	5	5
10	0	0	0	0	0	0	0	0	0	0	0	0	0	0	0
	0	0	0	0	0	0	0	0	0	0	0	0	0	0	0
	0	0	0	0	0	0	1	2	3	4	4	5	5	5	5
	0	0	0	0	0	1	2	4	4	4	5	5	5	5	5
	0	0	0	0	0	1	2	4	5	5	5	5	5	5	5
50	0	0	0	0	0	0	0	0	0	0	0	0	0	0	0
	0	0	0	0	0	0	0	0	0	0	0	0	0	0	0
	0	0	0	0	0	0	0	0	0	0	0	0	0	0	0
	0	0	0	0	0	0	0	0	0	0	0	0	0	0	0
	0	0	0	0	0	0	0	0	0	0	0	0	0	0	0
250	0	0	0	0	0	0	0	0	0	0	0	0	0	0	0
	0	0	0	0	0	0	0	0	0	0	0	0	0	0	0
	0	0	0	0	0	0	0	0	0	0	0	0	0	0	0
	0	0	0	0	0	0	0	0	0	0	0	0	0	0	0
	0	0	0	0	0	0	0	0	0	0	0	0	0	0	0
	Average					SD
	PBS	MGDG 250	MGDG 50	MGDG 10		PBS	MGDG 250	MGDG 50	MGDG 10
0	0	0	0	0		0	0	0	0
1	0	0	0	0		0	0	0	0
2	0	0	0	0		0	0	0	0
3	0	0	0	0		0	0	0	0
4	0.6	0	0	0		0.244949	0	0	0
5	1	0	0	0.4		0.316228	0	0	0.244949
6	1.8	0	0	1		0.374166	0	0	0.447214
7	3.4	0	0	2		0.509902	0	0	0.894427
8	4.2	0	0	2.4		0.374166	0	0	1.02956
9	4.8	0	0	2.6		0.2	0	0	1.07703
10	5	0	0	2.8		0	0	0	1.15758
11	5	0	0	3		0	0	0	1.22474
12	5	0	0	3		0	0	0	1.22474
13	5	0	0	3		0	0	0	1.22474
14	5	0	0	3		0	0	0	1.22474

## Sheet: Dataset of Fig 5C.
MGDG (µg/ml)	Virus yield (× 103 PFU/ml)					Average	SD
0	69	33	37	76	86	60.2	23.8265
10	44	34	20	0.6	0	19.72	19.6721
50	0	0	0	0	0	0	0
250	0	0	0	0	0	0	0

## Sheet: Dataset of Fig 6A.
Treatment	Survival days
PBS	7	7	7	8	8
ACV	9	10	14	14	14
MGDG (0.2 mg)	9	10	11	14	14
MGDG (1 mg)	10	11	12	14	14

## Sheet: Dataset of Fig 6B.
	Days after viral infection
	0	1	2	3	4	5	6	7	8	9	10	11	12	13	14
PBS	0	0	0	0	0	1	2	4	5	5	5	5	5	5
	0	0	0	0	1	1	3	4	5	5	5	5	5	5	5
	0	0	0	0	1	2	3	5	5	5	5	5	5	5	5
	0	0	0	0	1	2	4	5	5	5	5	5	5	5	5
	0	0	0	0	1	2	4	5	5	5	5	5	5	5	5
ACV	0	0	0	0	0	0	0	0	0	0	0	0	0	0	0
	0	0	0	0	0	0	0	1	1	1	1	1	1	1	1
	0	0	0	0	0	0	0	1	1	1	1	1	1	1	1
	0	0	0	0	0	1	2	2	3	4	5	5	5	5	5
	0	0	0	0	0	1	2	3	4	5	5	5	5	5	5
MGDG	0	0	0	0	0	0	0	0	0	0	0	0	0	0	0
(0.2 mg)	0	0	0	0	0	0	0	0	2	2	3	2	2	1	1
	0	0	0	0	0	1	2	3	3	4	4	5	5	5	5
	0	0	0	0	0	1	2	3	3	4	5	5	5	5	5
	0	0	0	0	1	1	3	3	4	5	5	5	5	5	5
MGDG	0	0	0	0	0	0	0	0	0	0	0	0	0	0	0
(1 mg)	0	0	0	0	0	0	0	0	1	1	1	1	1	1	1
	0	0	0	0	0	0	0	1	2	2	3	4	4	5	5
	0	0	0	0	0	1	2	2	3	4	4	5	5	5	5
	0	0	0	0	0	2	2	3	4	4	5	5	5	5	5
Days	Average					SE
	Control	ACV (0.2 mg)	MGDG (0.2 mg)	MGDG (1 mg)		Control	ACV (0.2 mg)	MGDG (0.2 mg)	MGDG (1 mg)
0	0	0	0	0		0	0	0	0
1	0	0	0	0		0	0	0	0
2	0	0	0	0		0	0	0	0
3	0	0	0	0		0	0	0	0
4	0.8	0	0.2	0		0.2	0	0.2	0
5	1.6	0.4	0.6	0.6		0.244949	0.244949	0.244949	0.4
6	3	0.8	1.4	0.8		0.374166	0.489898	0.6	0.489898
7	4.6	1.4	1.8	1.2		0.244949	0.509902	0.734847	0.583095
8	5	1.8	2.4	2		0	0.734847	0.678233	0.707107
9	5	2.2	3	2.2		0	0.969536	0.894427	0.8
10	5	2.4	3.4	2.6		0	1.07703	0.927362	0.927362
11	5	2.4	3.4	3		0	1.07703	1.02956	1.04881
12	5	2.4	3.4	3		0	1.07703	1.02956	1.04881
13	5	2.2	3.2	3.2		0	1.07703	1.11355	1.04881
14	5	2.2	3.2	3.2		0	1.07703	1.11355	1.04881

## Sheet: Dataset of Fig 6C
	Virus yield (× 103 PFU/ml)					Average	SD
PBS	183	76	194	87	84	124.8	58.4183
ACV	3.2	2.6	0.5	1.6	1.3	1.84	1.06911
MGDG (0.2 mg)	33	40	43	21	14	30.2	12.3976
MGDG (1 mg)	11	12	30	20	11	16.8	8.28855
